# Supplementary material for: Assessing Nursing Students’ Self-Perceptions about Safe Medication Management: Design and Validation of a Tool, the NURSPeM
Source: MDPI journal article supplement (doi:10.3390/ijerph19084663), 2022-04-12
Supplement: s1 [file s1]

**Table S1.** Loading factors from the exploratory factor analysis for the NURSPeM.

**Questionnaire 1: Self-perceptions about safe medication management**

| Safety in drug prescription               |                                                                                                                                    |             |             |             |             |             |             |             |
|-------------------------------------------|------------------------------------------------------------------------------------------------------------------------------------|-------------|-------------|-------------|-------------|-------------|-------------|-------------|
|                                           |                                                                                                                                    | Dimension 1 | Dimension 2 | Dimension 3 | Dimension 4 | Dimension 5 | Dimension 6 | Dimension 7 |
| 1                                         | How often do you know the most common dose of the drugs you administer to patients?                                                | .791        |             |             |             |             |             |             |
| 2                                         | How often do you know the most common prescription of the drugs you administer to patients?                                        | .740        |             |             |             |             |             |             |
| 3                                         | How often do you know the most common route of the drugs you administer to patients?                                               | .653        |             |             |             |             |             |             |
| 4                                         | In general, do you feel confident about performing drug calculations?                                                              | .466        |             |             |             |             |             |             |
| Familiarity with pharmacological concepts |                                                                                                                                    |             |             |             |             |             |             |             |
| 5                                         | To what extent are you familiar with the expected effects of the drugs that you administer to patients?                            |             | -.448       |             |             |             |             |             |
| 6                                         | To what extent are you familiar with the specific care or monitoring that a patient requires according to the drug you administer? |             | -.761       |             |             |             |             |             |
| 7                                         | To what extent are you familiar with the side effects of the drugs you administer to patients?                                     |             | -.711       |             |             |             |             |             |
| 8                                         | To what extent are you familiar with the possible interactions that may exist between the drugs you administer to patients?        |             | -.495       |             |             |             |             |             |
| Relevance for professional practice       |                                                                                                                                    |             |             |             |             |             |             |             |
| 9                                         | Rate the following statements according to the importance you believe they have for your professional practice:                    |             |             |             |             |             |             |             |
| 9.1                                       | • Knowledge about drug effects                                                                                                     |             |             | .556        |             |             |             |             |
| 9.2                                       | • Drug dose calculation                                                                                                            |             |             | .569        |             |             |             |             |
| 9.3                                       | • Management of drug administration                                                                                                |             |             | .793        |             |             |             |             |
| 9.4                                       | • Drug interactions                                                                                                                |             |             | .815        |             |             |             |             |
| 9.5                                       | • Required care of the patient during drug administration                                                                          |             |             | .743        |             |             |             |             |
| Factors associated with risk of error     |                                                                                                                                    |             |             |             |             |             |             |             |
| 10                                        | Do you think that the way nurses organise their duties and manage medication has an influence on the likelihood of errors?         |             |             |             | .482        |             |             |             |

|                                                              |                                                                                                                                                                          |  |  |  |      |       |       |       |
|--------------------------------------------------------------|--------------------------------------------------------------------------------------------------------------------------------------------------------------------------|--|--|--|------|-------|-------|-------|
| 11                                                           | Do you think that workload can influence drug dose calculation and medication management?                                                                                |  |  |  | .891 |       |       |       |
| 12                                                           | Do you think that fatigue can influence drug dose calculation and medication management?                                                                                 |  |  |  | .886 |       |       |       |
| <b>Importance of administering medications as prescribed</b> |                                                                                                                                                                          |  |  |  |      |       |       |       |
| 13                                                           | How important is it for you to administer the exact dose of the prescribed drug (without rounding off)?                                                                  |  |  |  |      | -.620 |       |       |
| 14                                                           | How important is it for you to check a patient's drug prescription?                                                                                                      |  |  |  |      | -.443 |       |       |
| 15                                                           | How important is it for you to know how to calculate the dose of a prescribed drug?                                                                                      |  |  |  |      | .657  |       |       |
| 16                                                           | To what extent do you think it is important to adhere to the prescribed frequency of the drugs you administer to patients?                                               |  |  |  |      | -.427 |       |       |
| <b>Verifications prior to drug administration</b>            |                                                                                                                                                                          |  |  |  |      |       |       |       |
| 17                                                           | Do you check the patient's identity before administering a drug?                                                                                                         |  |  |  |      |       | -.798 |       |
| 18                                                           | Do you check the six rights during drug preparation?<br><i>Six rights: right individual, right medication, right dose, right time, right route, right documentation.</i> |  |  |  |      |       | -.786 |       |
| 19                                                           | How often do you check that the drug is in good condition (expiry date, stability, colour, appearance, etc.) before administering it?                                    |  |  |  |      |       | -.410 |       |
| <b>Thinking process in relation to medication management</b> |                                                                                                                                                                          |  |  |  |      |       |       |       |
| 20                                                           | Do you check for side effects related to the drugs you administer to patients?                                                                                           |  |  |  |      |       |       | -.645 |
| 21                                                           | Do you check the expected effect of the drugs you administer to patients?                                                                                                |  |  |  |      |       |       | -.645 |
| 22                                                           | Do you explain to the patient/family why a drug is being administered?                                                                                                   |  |  |  |      |       |       | -.534 |
| 23                                                           | Do you explain to the patient/family the expected effects of the administered drug?                                                                                      |  |  |  |      |       |       | -.560 |
| 24                                                           | When planning and administering medication, do you take into account the other interventions (such as tests) that the patient undergoes?                                 |  |  |  |      |       |       | -.741 |

## Questionnaire 2: Frequency and learning of drug dose calculations

|                                           |                                                                              | Dimension 1 | Dimension 2 |
|-------------------------------------------|------------------------------------------------------------------------------|-------------|-------------|
| <b>Frequency of drug dose calculation</b> |                                                                              |             |             |
| 1                                         | How often do you calculate the dose of an oral medication?                   | 0.578       |             |
| 2                                         | How often do you calculate the dose of a parenteral medication (IM, SC, IV)? | 0.734       |             |

|                                       |                                                                                                             |       |       |
|---------------------------------------|-------------------------------------------------------------------------------------------------------------|-------|-------|
| 3                                     | How often do you calculate the dose of IV infusions?                                                        | 0.811 |       |
| 4                                     | How often do you calculate the IV flow rate in ml/h?                                                        | 0.791 |       |
| 5                                     | How often do you calculate the IV flow rate in drops/min?                                                   | 0.717 |       |
| 6                                     | How often do you calculate the IV flow rate in microdrops/min?                                              | 0.593 |       |
| 7                                     | How often do you check drug calculations using a different mathematical method (reasoning, equation, etc.)? | 0.460 |       |
| 8                                     | I feel confident about the drug calculations that I perform                                                 | 0.432 |       |
| 9                                     | I ask someone else to check my drug calculations                                                            | 0.355 |       |
| 10                                    | My drug calculation skills are assessed while on clinical placement                                         | 0.491 |       |
| 11                                    | I only maintain my drug calculation skills while on clinical placement                                      | 0.442 |       |
| <b>Learning drug dose calculation</b> |                                                                                                             |       |       |
| 12                                    | I maintain my drug dose calculation skills by doing practice exercises in my own time                       |       | 0.404 |
| 13                                    | I studied drug calculation during my bachelor studies:                                                      |       |       |
|                                       | <ul style="list-style-type: none"> <li>By attending classes and clinical skills workshops</li> </ul>        |       | 0.576 |
|                                       | <ul style="list-style-type: none"> <li>Through self-study with books</li> </ul>                             |       | 0.714 |
|                                       | <ul style="list-style-type: none"> <li>Through self-study with a computer</li> </ul>                        |       | 0.755 |
|                                       | <ul style="list-style-type: none"> <li>With another person</li> </ul>                                       |       | 0.587 |
|                                       | <ul style="list-style-type: none"> <li>Another method. Please specify:</li> </ul>                           |       |       |

**Table S2.** Inter-item correlations of the questionnaires.

[illegible]

[illegible]

**inter-item correlations - questionnaire 2**

|      | 1      | 2      | 3      | 4      | 5      | 6      | 7      | 8      | 9      | 10     | 11     | 12     | 13,1   | 13,2   | 13,3   | 13,4  |
|------|--------|--------|--------|--------|--------|--------|--------|--------|--------|--------|--------|--------|--------|--------|--------|-------|
| 1    | 1,000  |        |        |        |        |        |        |        |        |        |        |        |        |        |        |       |
| 2    | ,669** | 1,000  |        |        |        |        |        |        |        |        |        |        |        |        |        |       |
| 3    | ,574** | ,740** | 1,000  |        |        |        |        |        |        |        |        |        |        |        |        |       |
| 4    | ,459** | ,612** | ,776** | 1,000  |        |        |        |        |        |        |        |        |        |        |        |       |
| 5    | ,389** | ,427** | ,461** | ,547** | 1,000  |        |        |        |        |        |        |        |        |        |        |       |
| 6    | ,359** | ,358** | ,385** | ,397** | ,714** | 1,000  |        |        |        |        |        |        |        |        |        |       |
| 7    | ,360** | ,421** | ,449** | ,440** | ,266** | ,208** | 1,000  |        |        |        |        |        |        |        |        |       |
| 8    | ,425** | ,466** | ,496** | ,506** | ,290** | ,248** | ,498** | 1,000  |        |        |        |        |        |        |        |       |
| 9    | ,316** | ,363** | ,367** | ,319** | ,212** | ,174** | ,397** | ,212** | 1,000  |        |        |        |        |        |        |       |
| 10   | ,456** | ,503** | ,499** | ,507** | ,291** | ,241** | ,435** | ,547** | ,384** | 1,000  |        |        |        |        |        |       |
| 11   | ,275** | ,354** | ,381** | ,390** | ,225** | ,179** | ,395** | ,362** | ,334** | ,346** | 1,000  |        |        |        |        |       |
| 12   | ,337** | ,332** | ,364** | ,321** | ,223** | ,245** | ,432** | ,379** | ,300** | ,417** | 0,026  | 1,000  |        |        |        |       |
| 13,1 | ,214** | ,267** | ,276** | ,264** | ,113** | ,151** | ,258** | ,484** | ,187** | ,351** | ,246** | ,243** | 1,000  |        |        |       |
| 13,2 | ,231** | ,217** | ,234** | ,214** | ,154** | ,215** | ,255** | ,316** | ,195** | ,313** | 0,079  | ,444** | ,387** | 1,000  |        |       |
| 13,3 | ,267** | ,261** | ,258** | ,233** | ,147** | ,175** | ,258** | ,350** | ,208** | ,277** | ,148** | ,378** | ,421** | ,624** | 1,000  |       |
| 13,4 | ,274** | ,356** | ,314** | ,302** | ,129** | ,142** | ,307** | ,324** | ,333** | ,380** | ,197** | ,330** | ,415** | ,417** | ,507** | 1,000 |

The inter-item correlation among the same dimension is highlighted in grey.

## **QUESTIONNAIRE ON THE SELF-PERCEPTION OF THE RELEVANCE OF SAFE DRUG MANAGEMENT (NURSPeM)**

### ***Questionnaire 1: Self-perceptions about safe medication management***

***The next questionnaire will explore your self-perception regarding drug management and administration. It has 24 questions grouped under 7 conceptual domains:***

***Domain 1: Safety in drug prescription***

***Domain 2: Familiarity with pharmacological concepts***

***Domain 3: Relevance for professional practice***

***Domain 4: Factors associated with risk of error***

***Domain 5: Importance of administering medication as prescribed***

***Domain 6: Verifications prior to drug administration***

***Domain 7: Thinking process in relation to medication management***

***Mark in the columns the value of the response according to your self-perception about the question asked.***

| <b><i>Safety in drug prescription</i></b>               |                                                                                                                                    |                          |                            |                         |                                 |                          |
|---------------------------------------------------------|------------------------------------------------------------------------------------------------------------------------------------|--------------------------|----------------------------|-------------------------|---------------------------------|--------------------------|
|                                                         |                                                                                                                                    | <b><i>Never</i></b>      | <b><i>Occasionally</i></b> | <b><i>Sometimes</i></b> | <b><i>Most of the times</i></b> | <b><i>Always</i></b>     |
| <b>1</b>                                                | How often do you know the most common dose of the drugs you administer to patients?                                                | 0                        | 1                          | 2                       | 3                               | 4                        |
| <b>2</b>                                                | How often do you know the most common prescription of the drugs you administer to patients?                                        | 0                        | 1                          | 2                       | 3                               | 4                        |
| <b>3</b>                                                | How often do you know the most common route of the drugs you administer to patients?                                               | 0                        | 1                          | 2                       | 3                               | 4                        |
| <b>4</b>                                                | In general, do you feel confident about performing drug calculations?                                                              | 0                        | 1                          | 2                       | 3                               | 4                        |
| <b><i>Familiarity with pharmacological concepts</i></b> |                                                                                                                                    |                          |                            |                         |                                 |                          |
| <b>5</b>                                                | To what extent are you familiar with the expected effects of the drugs that you administer to patients?                            | 0                        | 1                          | 2                       | 3                               | 4                        |
|                                                         |                                                                                                                                    | <b><i>Not at all</i></b> | <b><i>Somewhat</i></b>     | <b><i>Quite</i></b>     | <b><i>Very much</i></b>         | <b><i>Completely</i></b> |
| <b>6</b>                                                | To what extent are you familiar with the specific care or monitoring that a patient requires according to the drug you administer? | 0                        | 1                          | 2                       | 3                               | 4                        |
| <b>7</b>                                                | To what extent are you familiar with the side effects of the drugs you administer to patients?                                     | 0                        | 1                          | 2                       | 3                               | 4                        |
| <b>8</b>                                                | To what extent are you familiar with the possible interactions that may exist between the drugs you administer to patients?        | 0                        | 1                          | 2                       | 3                               | 4                        |
| <b><i>Relevance for professional practice</i></b>       |                                                                                                                                    |                          |                            |                         |                                 |                          |

|                                                              |                                                                                                                                                                          |                      |           |       |            |                |
|--------------------------------------------------------------|--------------------------------------------------------------------------------------------------------------------------------------------------------------------------|----------------------|-----------|-------|------------|----------------|
| 9                                                            | Rate the following statements according to the importance you believe they have for your professional practice:                                                          | Not important at all |           |       |            | Very important |
| 9.1                                                          | • Knowledge about drug effects                                                                                                                                           | 0                    | 1         | 2     | 3          | 4              |
| 9.2                                                          | • Drug dose calculation                                                                                                                                                  | 0                    | 1         | 2     | 3          | 4              |
| 9.3                                                          | • Management of drug administration                                                                                                                                      | 0                    | 1         | 2     | 3          | 4              |
| 9.4                                                          | • Drug interactions                                                                                                                                                      | 0                    | 1         | 2     | 3          | 4              |
| 9.5                                                          | • Required care of the patient during drug administration                                                                                                                | 0                    | 1         | 2     | 3          | 4              |
| <b>Factors associated with risk of error</b>                 |                                                                                                                                                                          |                      |           |       |            |                |
|                                                              |                                                                                                                                                                          | Not at all           | Somewhat  | Quite | Very much  | Completely     |
| 10                                                           | Do you think that the way nurses organise their duties and manage medication has an influence on the likelihood of errors?                                               | 0                    | 1         | 2     | 3          | 4              |
| 11                                                           | Do you think that workload can influence drug dose calculation and medication management?                                                                                | 0                    | 1         | 2     | 3          | 4              |
| 12                                                           | Do you think that fatigue can influence drug dose calculation and medication management?                                                                                 | 0                    | 1         | 2     | 3          | 4              |
| <b>Importance of administering medication as prescribed</b>  |                                                                                                                                                                          |                      |           |       |            |                |
| 13                                                           | How important is it for you to administer the exact dose of the prescribed drug (without rounding off)?                                                                  | 0                    | 1         | 2     | 3          | 4              |
| 14                                                           | How important is it for you to check a patient's drug prescription?                                                                                                      | 0                    | 1         | 2     | 3          | 4              |
| 15                                                           | How important is it for you to know how to calculate the dose of a prescribed drug?                                                                                      | 0                    | 1         | 2     | 3          | 4              |
| 16                                                           | To what extent do you think it is important to adhere to the prescribed frequency of the drugs you administer to patients?                                               | 0                    | 1         | 2     | 3          | 4              |
| <b>Verifications prior to drug administration</b>            |                                                                                                                                                                          |                      |           |       |            |                |
|                                                              |                                                                                                                                                                          | Never                | Sometimes | Often | Very Often | Always         |
| 17                                                           | Do you check the patient's identity before administering a drug?                                                                                                         | 0                    | 1         | 2     | 3          | 4              |
| 18                                                           | Do you check the six rights during drug preparation?<br><i>Six rights: right individual, right medication, right dose, right time, right route, right documentation.</i> | 0                    | 1         | 2     | 3          | 4              |
| 19                                                           | How often do you check that the drug is in good condition (expiry date, stability, colour, appearance, etc.) before administering it?                                    | 0                    | 1         | 2     | 3          | 4              |
| <b>Thinking process in relation to medication management</b> |                                                                                                                                                                          |                      |           |       |            |                |
|                                                              |                                                                                                                                                                          | Never                | Sometimes | Often | Very Often | Always         |
| 20                                                           | Do you check for side effects related to the drugs you administer to patients?                                                                                           | 0                    | 1         | 2     | 3          | 4              |



|    |                                                                                                                                          |   |   |   |   |   |
|----|------------------------------------------------------------------------------------------------------------------------------------------|---|---|---|---|---|
| 21 | Do you check the expected effect of the drugs you administer to patients?                                                                | 0 | 1 | 2 | 3 | 4 |
| 22 | Do you explain to the patient/family why a drug is being administered?                                                                   | 0 | 1 | 2 | 3 | 4 |
| 23 | Do you explain to the patient/family the expected effects of the administered drug?                                                      | 0 | 1 | 2 | 3 | 4 |
| 24 | When planning and administering medication, do you take into account the other interventions (such as tests) that the patient undergoes? | 0 | 1 | 2 | 3 | 4 |

\*This questionnaire has been translated and culturally adapted into English, but the English version has not been validated.

### **Questionnaire 2: Frequency and learning of drug dose calculation**

The following questions refer to calculation medication that you have performed during your placements. Please, answer according to the instructions below:

| Frequency of drug dose calculation |                                                                                                             |       |                      |                  |                  |        |
|------------------------------------|-------------------------------------------------------------------------------------------------------------|-------|----------------------|------------------|------------------|--------|
|                                    |                                                                                                             | Never | Less than once /week | 1-2 times a week | 3-4 times a week | Daily  |
| 1                                  | How often do you calculate the dose of an oral medication?                                                  | 0     | 1                    | 2                | 3                | 4      |
| 2                                  | How often do you calculate the dose of a parenteral medication (IM, SC, IV)?                                | 0     | 1                    | 2                | 3                | 4      |
| 3                                  | How often do you calculate the dose of IV infusions?                                                        | 0     | 1                    | 2                | 3                | 4      |
| 4                                  | How often do you calculate the IV flow rate in ml/h?                                                        | 0     | 1                    | 2                | 3                | 4      |
| 5                                  | How often do you calculate the IV flow rate in drops/min?                                                   | 0     | 1                    | 2                | 3                | 4      |
| 6                                  | How often do you calculate the IV flow rate in microdrops/min?                                              | 0     | 1                    | 2                | 3                | 4      |
|                                    |                                                                                                             | Never | Sometimes            | Often            | Very Often       | Always |
| 7                                  | How often do you check drug calculations using a different mathematical method (reasoning, equation, etc.)? | 0     | 1                    | 2                | 3                | 4      |
| 8                                  | I feel confident about the drug calculations that I perform                                                 | 0     | 1                    | 2                | 3                | 4      |

|                                       |                                                                                       |   |   |   |   |   |
|---------------------------------------|---------------------------------------------------------------------------------------|---|---|---|---|---|
| 9                                     | I ask someone else to check my drug calculations                                      | 0 | 1 | 2 | 3 | 4 |
| 10                                    | My drug calculation skills are assessed while on clinical placement                   | 0 | 1 | 2 | 3 | 4 |
| 11                                    | I only maintain my drug calculation skills while on clinical placement                | 0 | 1 | 2 | 3 | 4 |
| <b>Learning drug dose calculation</b> |                                                                                       |   |   |   |   |   |
| 12                                    | I maintain my drug dose calculation skills by doing practice exercises in my own time | 0 | 1 | 2 | 3 | 4 |
| 13                                    | I studied drug calculation during my bachelor studies:                                | 0 | 1 | 2 | 3 | 4 |
|                                       | • By attending classes and clinical skills workshops                                  | 0 | 1 | 2 | 3 | 4 |
|                                       | • Through self-study with books                                                       | 0 | 1 | 2 | 3 | 4 |
|                                       | • Through self-study with a computer                                                  | 0 | 1 | 2 | 3 | 4 |
|                                       | • With another person                                                                 | 0 | 1 | 2 | 3 | 4 |
|                                       | • Another method. Please specify:                                                     |   |   |   |   |   |

\*This questionnaire has been translated and culturally adapted into English, but the English version has not been validated.

Tool developed and validated in Spanish by Llaurodo-Serra M, Fuster P, Gallart A, Rodríguez-Higueras E / Nursing Department, Universitat Internacional de Catalunya, Spain. The present version in English has been translated and backtranslated and culturally adapted. However, it is not psychometrically validated. ©reproduced with the author's own permission.
